# Supplementary material for: Continuous-flow reactor with superior production rate and stability for CO2 reduction using semiconductor photocatalysts
Source: Royal Society of Chemistry journal article supplement (doi:10.1039/d3ee00507k), 2023-01-01
Supplement: d3ee00507k1.pdf [file d3ee00507k1.pdf]

## Supplementary Information

### Continuous-Flow Reactor with Superior Production Rate and Stability for CO<sub>2</sub> reduction using Semiconductor Photocatalysts

Hyunju Jung<sup>1,2</sup>, Chansol Kim<sup>3</sup>, Hae-Wook Yoo<sup>4</sup>, Jei You<sup>5</sup>, Jin Seog Kim<sup>5</sup>, Aqil Jamal<sup>6</sup>, Issam Gereige<sup>6</sup>, Joel W. Ager<sup>2, 7\*</sup>, and Hee-Tae Jung<sup>1, 8\*</sup>

<sup>1</sup> Department of Chemical and Biomolecular Engineering, Korea Advanced Institute of Science and Technology (KAIST), 291 Daehak-ro, Yuseong-gu, Daejeon 34141, South Korea

<sup>2</sup> Chemical Sciences Division, Lawrence Berkeley National Laboratory, 1 Cyclotron Road, Berkeley, California 94720, USA

<sup>3</sup> Clean Energy Research Center, Korea Institute of Science and Technology (KIST), Hwarang-ro 14-gil 5, Seongbuk-gu, 02792, South Korea

<sup>4</sup> The First R&D Institute, Agency for Defense Development, Yuseong-gu, Daejeon 305-600, South Korea

<sup>5</sup> Gas Isotope Metrology Team, Korea Research Institute of Standards and Science, Daejeon 34113, South Korea

<sup>6</sup> Saudi Aramco, Research and Development Center, Dhahran, 31311 Saudi Arabia

<sup>7</sup> Department of Materials Science and Engineering, University of California Berkeley

<sup>8</sup> Korea Advanced Institute of Science and Technology (KAIST) Institute for Nanocentury, Daejeon 34141, South Korea

\*Corresponding author. Email: [jwager@lbl.gov](mailto:jwager@lbl.gov), [heetae@kaist.ac.kr](mailto:heetae@kaist.ac.kr)

#### This file includes:

Materials and Methods  
Supplementary Text  
Figs. S1 to S12  
Table S1 to S2  
References (1–14)

## 1 **Materials and Methods**

2

### 3 Materials

4 Methanol (MeOH), Nafion 117 solution (~5 wt%), chloroplatinic acid solution ( $\text{H}_2\text{PtCl}_6$ , 8  
5 wt% in  $\text{H}_2\text{O}$ ), zinc oxide (ZnO), and cadmium sulfide (CdS) were purchased from Sigma-  
6 Aldrich.  $\text{TiO}_2$  powder (P25, Degussa) and  $\text{C}_3\text{N}_4$  powder were used as received. The gas  
7 diffusion layer (GDL; Porex PM21M) was purchased from Fuel Cell Store. All chemicals were  
8 used as received without further purification.

9

### 10 Preparation of catalyst layers

11 The catalyst ink applied to all of the photocatalytic materials in this work was prepared  
12 through the ultrasonic dispersion of 10 mg of the catalyst powder with 20  $\mu\text{L}$  of Nafion solution  
13 in 10 mL MeOH for 30 min. Then, 500  $\mu\text{L}$  of the as-prepared catalyst ink was spray-coated on  
14 the GDL, and the electrode was dried overnight.

15

### 16 Synthesis of Pt-P25

17 The Pt-P25 photocatalysts were prepared through a photoreduction method. In a typical  
18 process<sup>1,2</sup>, 1 g of P25 powder was suspended in a 100 mL solution ( $\text{H}_2\text{O}:\text{MeOH} = 7:3$  v/v).  
19 Then, 5 mg of the  $\text{H}_2\text{PtCl}_6$  solution (0.5 wt%) was added into the suspension under  
20 ultrasonication and stirred in the dark for 3 h before irradiation under a 300 W Xe lamp for 3  
21 h. The obtained products were washed, filtered, and dried overnight at 80 °C. Finally, Pt-P25  
22 powder was applied to GDL in the same manner as described above and used in the experiment.

23

### 24 Photocatalytic reaction in batch reactors

25 For the gas-phase batch reaction, the test for photocatalytic  $\text{CO}_2$  conversion performance was  
26 conducted in a 50 mL SUS reactor with a quartz window on the top. The light source was a  
27 300 W Xe lamp, and the intensity of light in the reactor was 300  $\text{mW}/\text{cm}^2$ . A 1  $\text{cm}^2$  specimen  
28 of the sample was placed at the bottom of the reactor, and the vessel was charged with 4 mL  
29 of  $\text{H}_2\text{O}$ . The reactor was sufficiently purged with  $\text{CO}_2$  to ensure that the catalyst was saturated  
30 with  $\text{CO}_2$  and  $\text{H}_2\text{O}$  vapors.

31 For the liquid-phase batch reaction, the experiment was performed under the same conditions  
32 as those used for the gas-phase reaction, but a 96 mL glass reactor with a quartz window filled  
33 with 50 mL of  $\text{CO}_2$  purged water was used. Photocatalytic reactions were allowed to occur for  
34 each set time, and the amounts of the CO and  $\text{CH}_4$  obtained were analyzed using a gas  
35 chromatograph (GC; Agilent 7890GC) connected to the reactor.

36

### 37 Photocatalytic reaction in the photo-GDE

38 The custom-made photo-GDE shown in Fig. S1 was built in-house and consists of a quartz  
39 window housing, gaskets, a catalyst layer, a gas flow plate, an electrolyte flow plate, and a back  
40 plate. The window housing, flow plates, and back plate were made from stainless steel, owing  
41 to its chemical inertness, with sizes of  $6 \times 6 \times 1$   $\text{cm}^3$ . Pressurized gas flow was controlled using  
42 a gas regulator and a mass flow meter, and transported to gas flow plate adjoining one side of  
43 the catalyst layer through a  $1/8$ " diameter Teflon-lined tube. The electrolyte plate was filled with  
44 water cycled by a peristaltic pump and the electrolyte feed was delivered to the other side of  
45 the catalyst layer through a  $1/8$ " diameter Teflon tube. Light from a 300 W Xe lamp passed  
46 through the window housing and the electrolyte to the catalyst layer surface. All gaskets and  
47 flow plates had a 1  $\text{cm}^2$  hole in the middle. All parts were assembled and fastened with four  
48 bolts. The product generated by the continuous reaction under light irradiation entered the in-

1 line GC system for analysis during each of the set reaction times. Before measurement, the  
 2 baseline was checked by measuring pure CO<sub>2</sub> gas to detect any residual gas in the reactors.

3  
 4 Isotope-labeling measurement

5 The isotope-labeling test was conducted using <sup>13</sup>CO<sub>2</sub> (isotope purity 99% < 2% <sup>18</sup>O and  
 6 chemical purity 99.8%; Cambridge Isotope Laboratories, Inc.) as the carbon source. For  
 7 accurate measurements, the reaction was allowed to occur under high-concentration  
 8 conditions: gas flow rate of 2 sccm, gas pressure of 1.2 bar, and water flow rate of ~166  
 9 mL/min. Other conditions for <sup>13</sup>CO<sub>2</sub> photoreduction were the same as those utilized for other  
 10 photoreactions in the flow system. The gas products were analyzed by gas chromatography–  
 11 mass spectrometry (7890B GC Agilent Technologies, USA, 5977A Series GC/MSD System,  
 12 Agilent Technologies, USA) equipped with a column for detecting <sup>13</sup>CH<sub>4</sub> and <sup>13</sup>CO products  
 13 (RT-MOLESIEVE 13 X, 30 m × 0.21 mm × 30 μm). Helium was used as the carrier gas at a  
 14 flow rate of 2 mL/min.

15  
 16 Product analysis

17 The production rate in the batch-type reactor was determined according to the following  
 18 equations:

19 For the CO production rate:

$$20 \quad y_{CO} = \frac{CO \text{ produced (mol)}}{catalyst \text{ amount (g)} \cdot \text{reaction time (hr)}}$$

$$21 \quad = \frac{\text{fraction of CO (\%)} \cdot \text{Reactor Pressure (atm)} \cdot \text{Reactor volume (L)}}{0.082 \left( \frac{atm \cdot L}{mol \cdot K} \right) \cdot \text{reactor Temperature (K)} \cdot \text{catalyst amount (g)} \cdot \text{reaction time (hr)}}$$

22  
 23  
 24 In the case of a flow reactor such as photo-GDE, the production rate was calculated by  
 25 considering the total number of moles of gas entering the GC system and the ratio of the  
 26 products formed therein.

27 For the CO production rate:

$$28 \quad y_{CO} = \frac{CO \text{ produced (mol)}}{catalyst \text{ amount (g)} \cdot \text{reaction time (hr)}} = \frac{\text{fraction of CO (\%)} \cdot n_{total}}{catalyst \text{ amount (g)} \cdot \text{reaction time (hr)}} \text{ and}$$

$$29 \quad n_{total} = \frac{\text{atmospheric pressure (atm)} \cdot \text{injected sample volume (L)}}{0.082 \left( \frac{atm \cdot L}{mol \cdot K} \right) \cdot \text{room temperature (K)}}$$

$$30 \quad = \frac{\text{atmospheric pressure} \cdot \text{gas flow rate} \left( \frac{ml}{min} \right) \cdot \text{gas flow time (min)}}{0.082 \left( \frac{atm \cdot L}{mol \cdot K} \right) \cdot \text{room temperature (K)}}$$

31  
 32  
 33  
 34 By combining the above two formulas, as the reaction time was the same as the time of the  
 35 gas flow in a continuous reactor:

$$36 \quad y_{co} = \frac{\text{fraction of CO (\%)} \cdot \text{atmospheric pressure} \cdot \text{gas flow rate} \left( \frac{ml}{min} \right)}{0.082 \left( \frac{atm \cdot L}{mol \cdot K} \right) \cdot \text{room temperature (K)} \cdot \text{catalyst amount (g)}}$$

- 1
- 2 The production rate of  $\text{CH}_4$  was determined in the same manner as shown above.
- 3
- 4

1 **Table S1. The process and factors for stabilizing the system.** The critical factors: 1) Light  
 2 direction, 2) gas flow control under pressurized 3) water flow control.

3

| Process                  | Issues                                                                                                                                | Solutions                                                                                                                                                | Factor                                                                                        |
|--------------------------|---------------------------------------------------------------------------------------------------------------------------------------|----------------------------------------------------------------------------------------------------------------------------------------------------------|-----------------------------------------------------------------------------------------------|
| Stability of system      | Carbon-based GDLs are easily damaged during the reaction.                                                                             | In the photocatalytic reaction, conductive support is not essential, so robust and thin PTFE GDL is used.                                                | Robust support materials for GDL                                                              |
| Light Direction          | GDL is opacity                                                                                                                        | Irradiate light towards the catalyst coated side                                                                                                         | light irradiation on the catalyst                                                             |
|                          | When light irradiated through gas layer, water does not encounter the catalyst through GLD                                            | Irradiate light through a quartz window filled with water.                                                                                               | Supply all reactants to the catalyst                                                          |
| Temperature control      | The temperature rise is large by heating the water trapped in the light.                                                              | Electrolyte converted to flow form with an open bottle.                                                                                                  | Distributes heat build-up with fluid flow                                                     |
| Water line configuration | At pressures above atmospheric pressure, the gas escapes as bubbles towards the water layer.                                          | Connect both sides of the water line to circulate in a closed state.                                                                                     | Pressure equalization with closed water line                                                  |
| Water flow rate control  | As the water circulation rate increases, water overflows into the gas layer.                                                          | Equilibrate by increasing the pressure or lowering the water flow rate                                                                                   | Appropriate water flow rate range                                                             |
| Gas flow control.        | Gas with pressure cannot flow into the reactor with a constant flow rate. Flow control through the MFC does not vent pressurized gas. | The pressure in the gas line going into the reactor is regulated and the outgoing gas is passed through the MFC to control the flow rate.                | Simultaneously control the pressure at the front of the reactor and the flow rate at the rear |
|                          | Moisture permeates the MFC, making it difficult to control accurately                                                                 | The gas flow rate exiting the reactor is controlled through the needle valve, and it is accurately measured by MFM after the gas exiting through the GC. | Stable and precise flow control with mechanical valves and digital meters                     |
|                          | At high gas pressure, gas leaks as bubbles into the electrolyte layer                                                                 | Adjust the pressure range until gas comes out of the bubble.                                                                                             | Appropriate gas pressure range                                                                |

4

5

1 **Table S2. The photocatalytic performances of P25 in CO<sub>2</sub> reduction reaction.**

2

| Reactor type            | Reactant supply                                                                                   | Reaction time | Light source                                   | Production rate                                                                                    | Ref. No.  |
|-------------------------|---------------------------------------------------------------------------------------------------|---------------|------------------------------------------------|----------------------------------------------------------------------------------------------------|-----------|
| Continuous flow reactor | CO <sub>2</sub> gas diffused into photocatalyst layer and water flowed in front of catalyst layer | 720 min       | 300W Xe lamp                                   | CO: 327 $\mu\text{mol/g}\cdot\text{hr}$<br>CH <sub>4</sub> : 23.6 $\mu\text{mol/g}\cdot\text{hr}$  | This work |
| Liquid Batch cell       | CO <sub>2</sub> purged water                                                                      | 240 min       | 300W Xe lamp                                   | CO: 0.5 $\mu\text{mol/g}\cdot\text{hr}$                                                            | 3         |
| Gas Batch cell          | CO <sub>2</sub> gas purged to reactor with D.I water                                              | 60min         | 300W Xe lamp                                   | CO: 1.7 $\mu\text{mol/g}\cdot\text{hr}$<br>CH <sub>4</sub> : 0.42 $\mu\text{mol/g}\cdot\text{hr}$  | 4         |
| Gas Batch cell          | Humidified CO <sub>2</sub> gas                                                                    | 360min        | 1 Sun Solar simulator with 425nm cutoff filter | CO: 0.5 $\mu\text{mol/g}\cdot\text{hr}$                                                            | 5         |
| Gas Batch cell          | CO <sub>2</sub> gas purged to reactor with D.I water                                              | 180min        | 300W Xe lamp                                   | CO: 3.97 $\mu\text{mol/g}\cdot\text{hr}$<br>CH <sub>4</sub> : 0.06 $\mu\text{mol/g}\cdot\text{hr}$ | 6         |
| Gas Batch cell          | CO <sub>2</sub> gas purged to reactor with D.I water                                              | 600min        | 300W Xe lamp                                   | CO: 3.54 $\mu\text{mol/g}\cdot\text{hr}$<br>CH <sub>4</sub> : 0.02 $\mu\text{mol/g}\cdot\text{hr}$ | 7         |
| Gas Batch cell          | CO <sub>2</sub> gas purged to reactor with D.I water                                              | 300min        | 300W Xe lamp                                   | CO: 0.39 $\mu\text{mol/g}\cdot\text{hr}$<br>CH <sub>4</sub> : 0.1 $\mu\text{mol/g}\cdot\text{hr}$  | 8         |
| Liquid Batch cell       | CO <sub>2</sub> purged water                                                                      | 360min        | high-pressure Hg lamp                          | CH <sub>4</sub> : 4 $\mu\text{mol/g}\cdot\text{hr}$                                                | 9         |

3

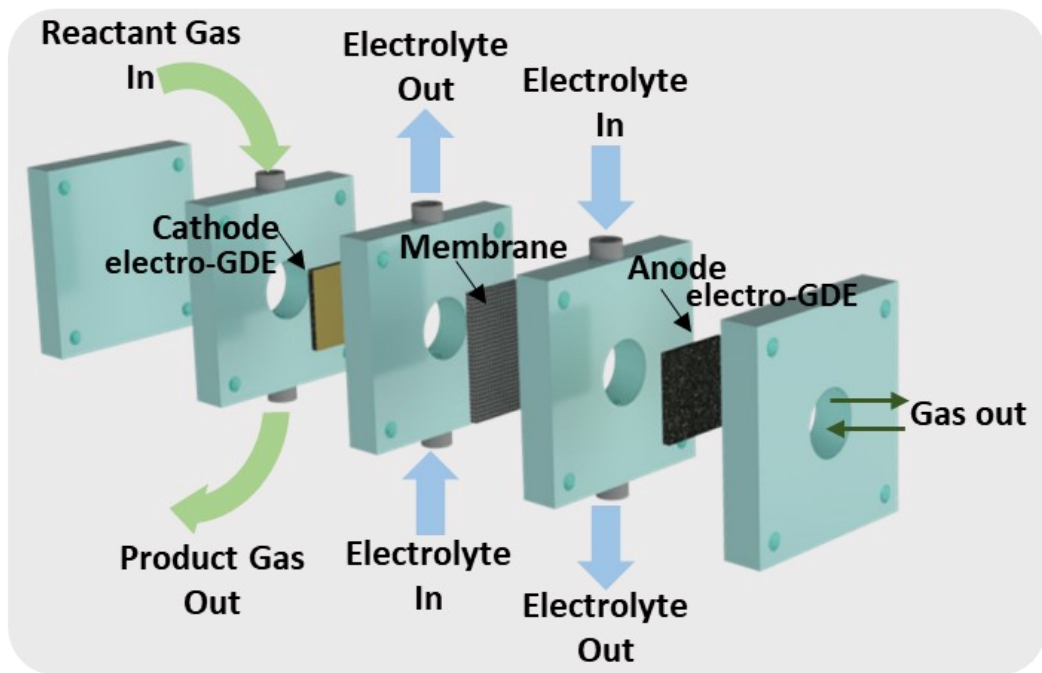

Figure S1. Magnified diagram of a conventional electro-GDE system.

1  
2  
3  
4

1

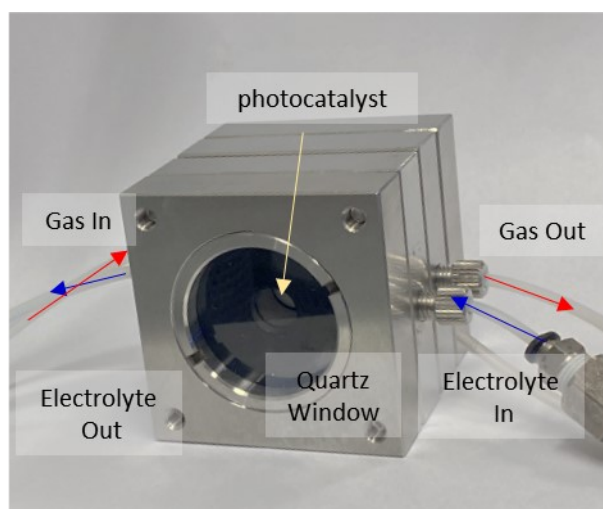

2  
3  
4  
5

**Figure S2. Photograph of the assembled continuous-flow photocatalytic reactor.**



**A**

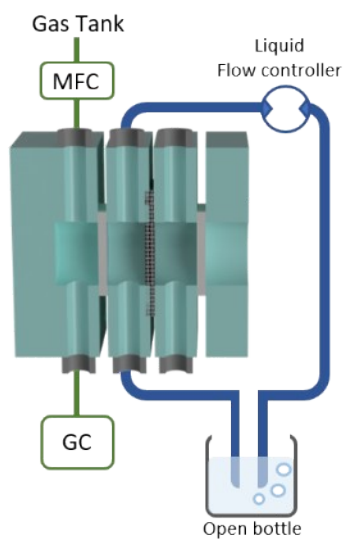

**B**

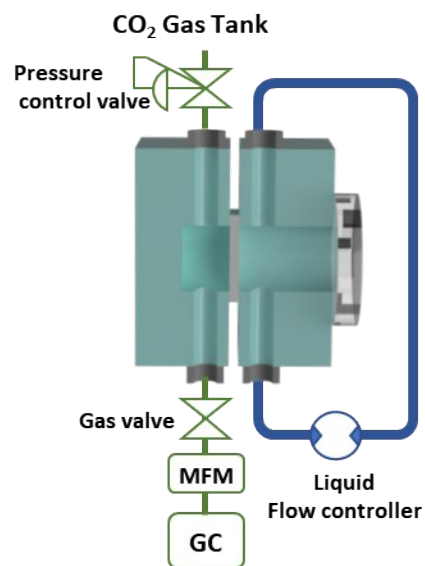

**Figure S3. Schematic of the system connections of (A) the flow system of the electrocatalytic system and (B) the continuous-flow photocatalytic reactor system.**

1  
2  
3  
4  
5

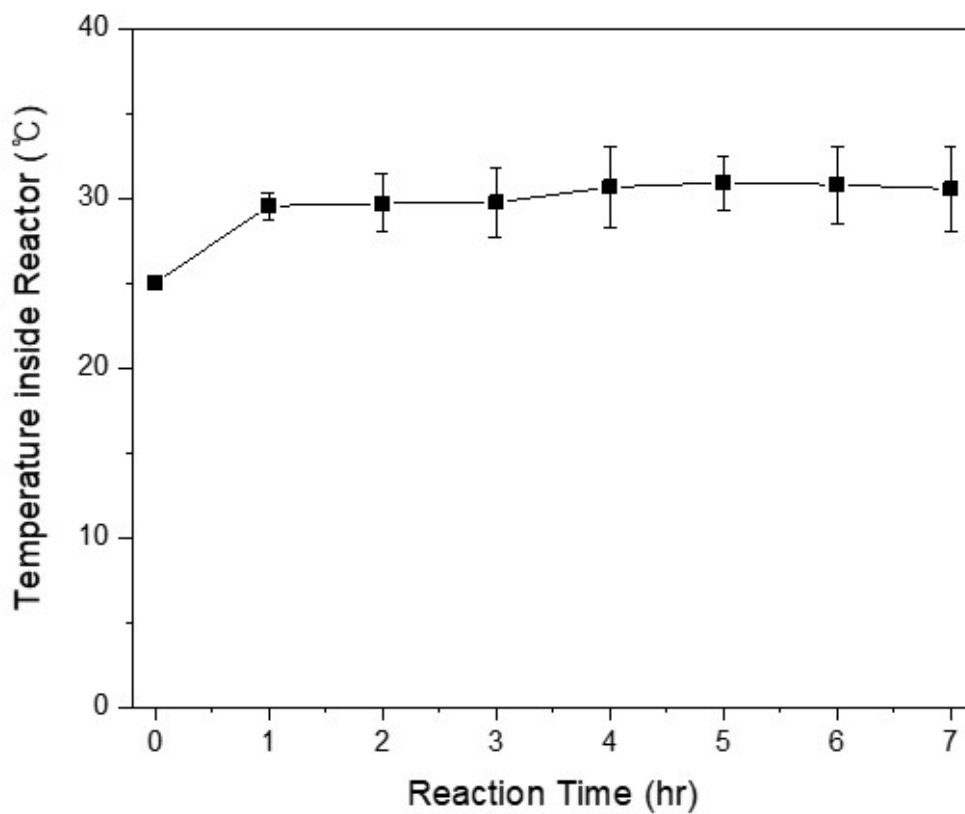

1  
2  
3  
4  
5  
6  
7  
8  
9

**Figure S4. Internal temperature of the reactor as a function of reaction time.** Real-time temperature measurements were conducted by inserting a thermocouple inside the liquid plate. Even if the reaction proceeded for greater than 7 h, the temperature inside the reactor did not exceed ~ 30°C.

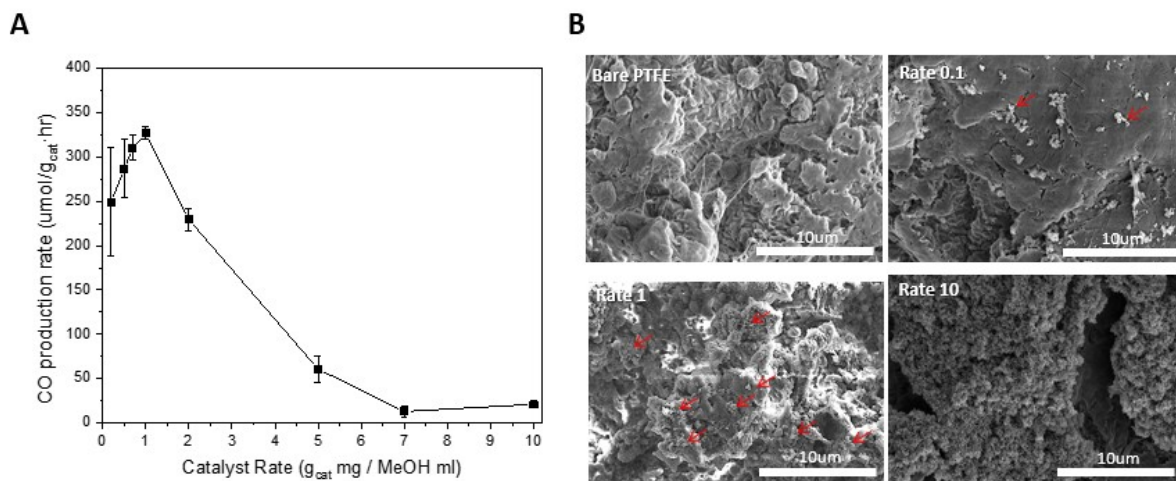

1  
 2 **Figure S5. CO production rate and dispersed catalyst images as a function of the**  
 3 **catalyst loading amounts.** (A) CO production rates with various catalyst loading amounts.  
 4 The catalyst rate was calculated by dividing the volume of methanol solvent by the amount of  
 5 catalyst in the catalyst ink. The same volume of catalyst inks (500  $\mu$ L) was applied to the  
 6 PTFE film. (B) Surface images from scanning electron microscopy (SEM) according to each  
 7 of the loading amounts: bare PTFE film, catalyst rates of 0.1, 1, and 10 mg/mL.  
 8  
 9  
 10

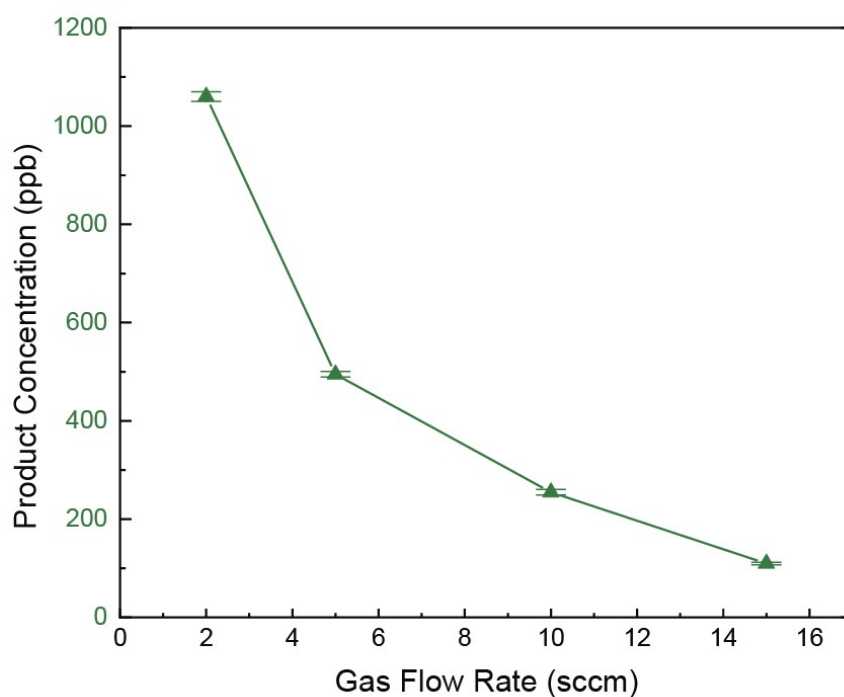

1  
2  
3  
4  
5  
6  
7  
8  
9

**Figure S6. Product concentration as a function of the gas flow rate in the photocatalytic flow reactor system in this work under same reaction conditions: P25 (rate 1) on PTFE, 300W Xe Lamp irradiation, CO<sub>2</sub> gas pressure: 1.2 bar, electrolyte flow rate: 16.6 mL/min.**

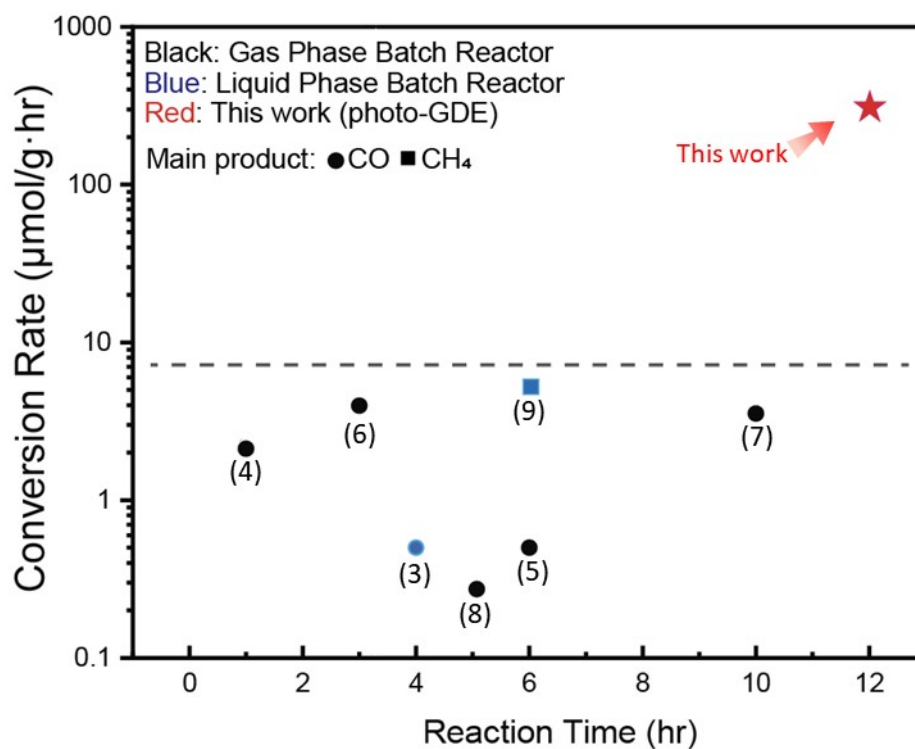

1  
 2 **Figure S7. State-of-the-art CO<sub>2</sub> photoconversion rates of P25.** Conversion rates of CH<sub>4</sub>  
 3 (solid square, ■) and CO (empty circle, ○) for CRR photocatalysts as a function of reaction  
 4 time.<sup>3-9</sup>  
 5  
 6

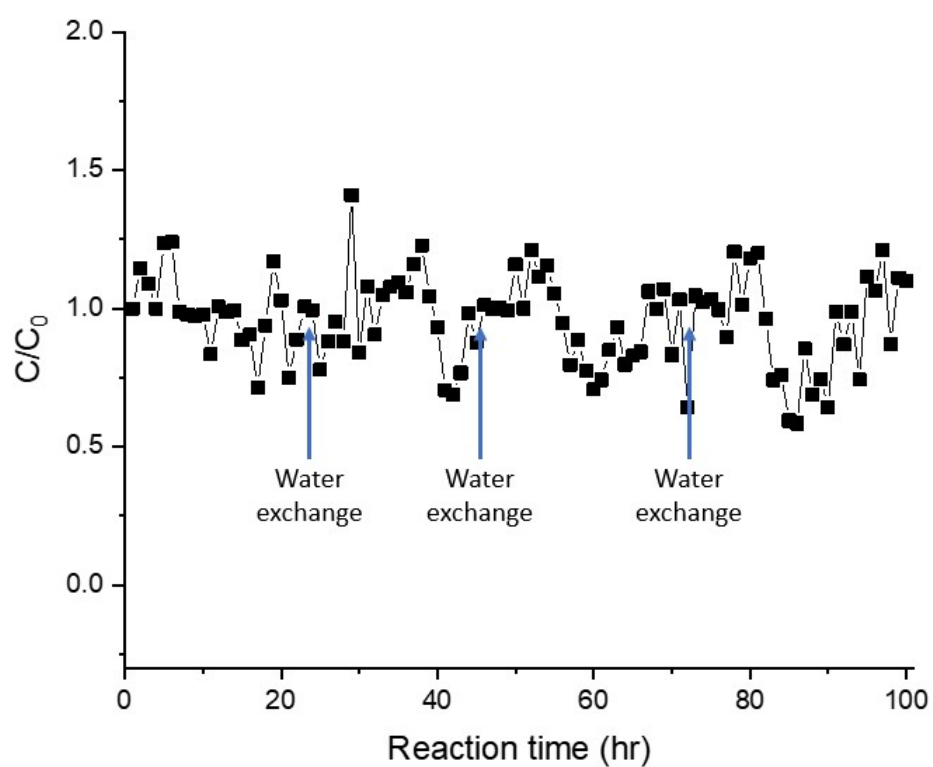

1  
2  
3  
4  
5  
6  
7

**Figure S8. Ratio of the total production rate to the initial value ( $C/C_0$ ) measured in the flow-type photocatalytic reactor in 100hr. Water lost due to evaporation was replenished every 24 hours (indicated by the blue arrow).**

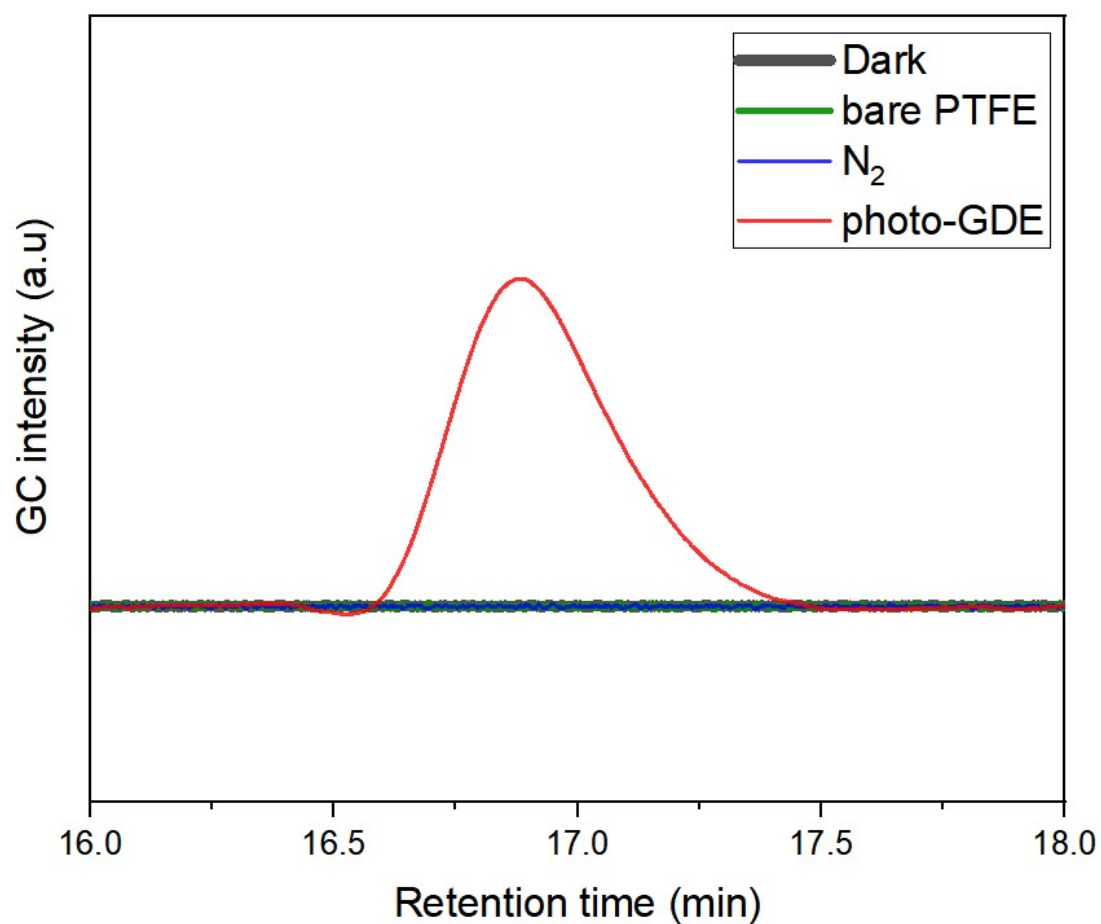

1  
2 **Figure S9. CO peak intensity from gas chromatography analysis under various reaction**  
3 **conditions.** i) Without light irradiation (dark line), ii) with light irradiation of N<sub>2</sub> and H<sub>2</sub>O  
4 streams in the absence of CO<sub>2</sub> (blue line), iii) with light irradiation in the presence of CO<sub>2</sub> using  
5 a bare PTFE film without photocatalysts (green line), and iv) with light irradiation in the  
6 presence of CO<sub>2</sub> with the P25 photocatalyst (red line).  
7  
8

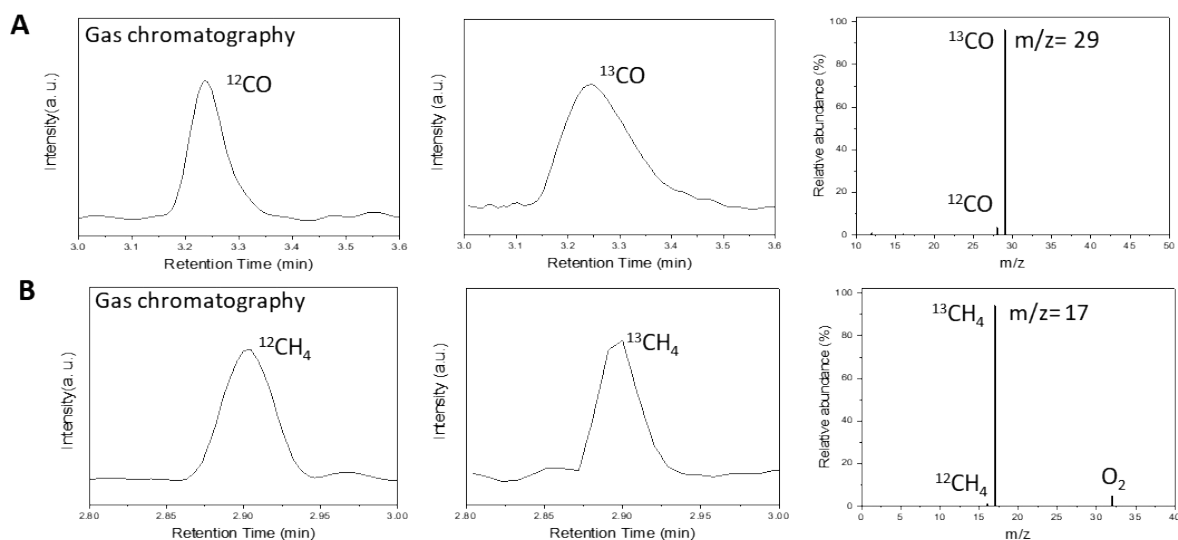

1  
2  
3  
4  
5  
6  
7  
8  
9  
10  
11  
12  
13  
14  
15  
16  
17  
18

**Figure S10. the isotope-labelling test.** the GC–MS chromatogram and mass spectra of (A) CO and (B)  $\text{CH}_4$ .

Isotope-labeled carbon dioxide ( $^{13}\text{CO}_2$ ) was subjected to photoreduction under the same reaction conditions, albeit at a low gas flow rate to obtain a high number of products beyond the detection limit of the MS detector. The MS signals for the two main products, *i.e.*, CO and  $\text{CH}_4$ , respectively, were investigated. In both products, most of the mass components mainly correspond to products containing  $^{13}\text{C}$ . For CO, the ion chromatography peak appears at  $\sim 3.24$  min, which corresponds to CO as the main product. On the other hand, in the case of general  $\text{CO}_2$  photoreduction, the main MS signal observed at  $m/z = 28$  corresponds to  $^{12}\text{CO}$ , and in the case of the isotope-labeled reaction, the main MS signal observed at  $m/z = 29$  corresponds to  $^{13}\text{CO}$ . Thus, this confirms that the CO product originates from photoreduction of  $\text{CO}_2$  in our flow reactor. Similarly,  $\text{CH}_4$  from the flow reactor system is also a direct product of the photoreduction of  $\text{CO}_2$ , as its main MS signal at  $m/z = 17$  corresponds to  $^{13}\text{CH}_4$ .



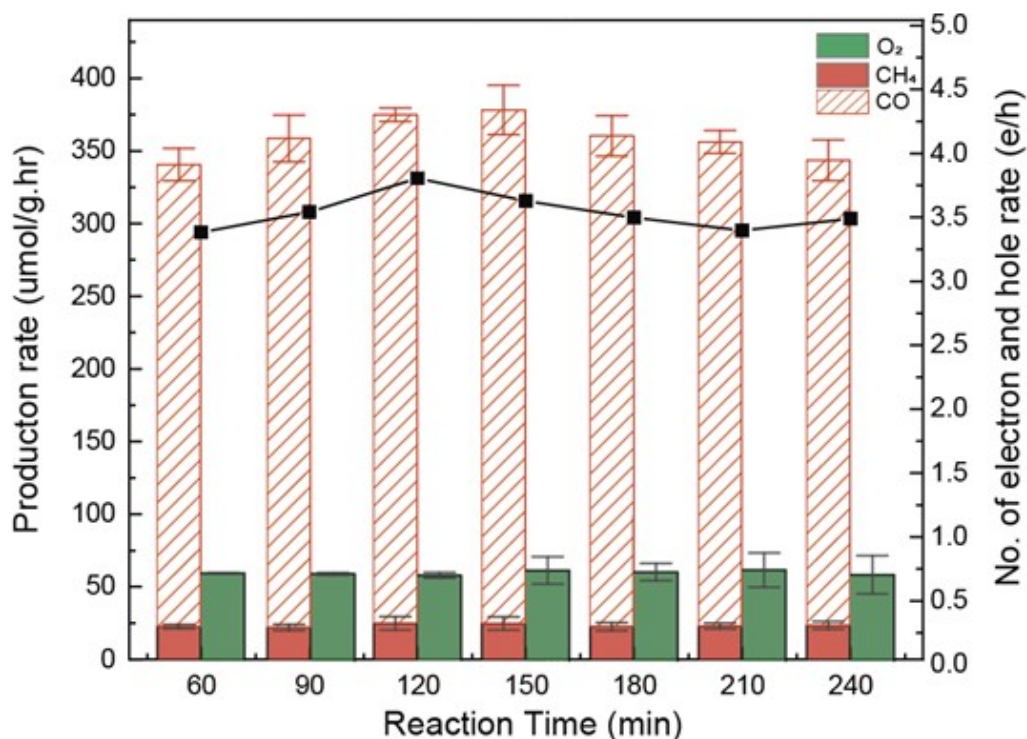2  
3

4 **Figure S11. O<sub>2</sub> production rates compared with those of CO and CH<sub>4</sub> (left), and the**  
 5 **number ratio of the generated electrons and holes (right).** The reaction conditions were  
 6 the same as those shown in Fig. 4.

7

8 In order to enhance our comprehension of the full cycle reaction in this system, O<sub>2</sub> production  
 9 rate from water oxidation was measured. During a reaction time of 4 hours, the total production  
 10 rate from CO<sub>2</sub>R products was greater than ~350 μmol/g·h, while the production rate of O<sub>2</sub> from  
 11 water oxidation was considerably lower (~60 μmol/g·h), reflecting the total number of electrons  
 12 and holes used in the products. Generally, two electrons are needed to form CO, eight electrons  
 13 to form CH<sub>4</sub>, and four holes to form O<sub>2</sub>. The ratio of the photogenerated holes to electrons (e/h  
 14 ratio) is ≥3 during the reaction, which was unexpected given that only CO<sub>2</sub>R and stoichiometric  
 15 water oxidation were expected to occur during photocatalysis. When light energy is absorbed  
 16 by the photocatalyst, one electron-hole pair is produced. According to the theory, the number  
 17 of electrons and holes in the product should be equal (e/h rate = 1). It is important to highlight  
 18 that other research studies have also observed an e/h ratio greater than 1 and that there is no  
 19 consistent explanation for this phenomenon in the field. One relevant study<sup>10</sup> proposed various  
 20 possible explanations, such as surface charge trapping, O<sub>2</sub> adsorption, and oxidation of Cl-  
 21 contaminants. Interestingly, this study also found that the e/h ratio tended to approach unity  
 22 after prolonged photocatalytic operation (up to 50 hours).

23 In our case, although the exact cause of this phenomenon remains unclear, based on the  
 24 characteristics of our catalyst system observed during CO<sub>2</sub> reaction, it is possible to infer that  
 25 the detected amount of O<sub>2</sub> decreased due to the rapid desorption of OH intermediates that  
 26 facilitate the detachment of reaction products before O<sub>2</sub> formation. Consequently, the generated  
 27 holes are expected to primarily oxidize water into OH and H<sub>2</sub>O<sub>2</sub>. We aim to investigate the  
 28 specific and possibly limiting role of water oxidation in future research.

1

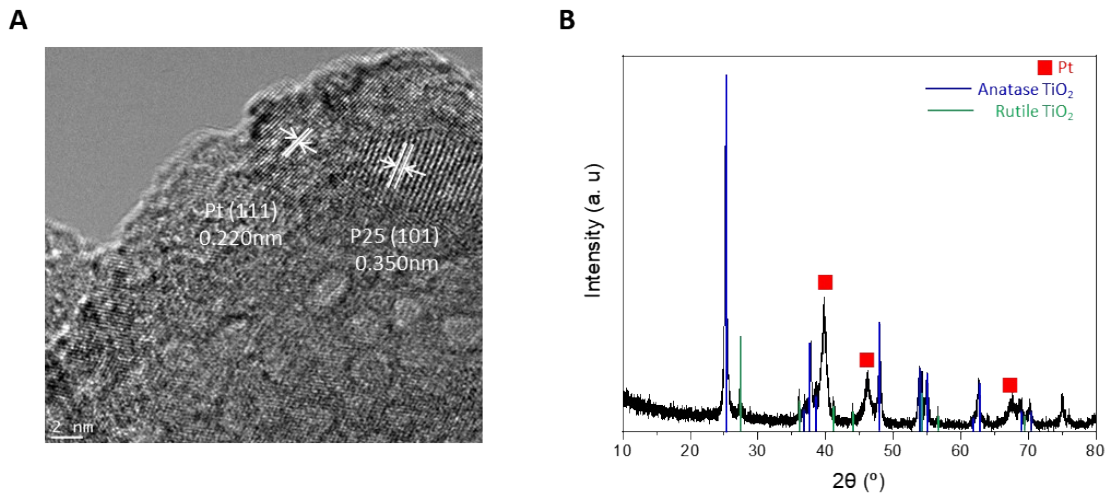

2

3 **Figure S12. Characterizations of Pt-P25.** (A) The as-synthesized Pt-P25 composite exhibits  
4 matching lattice distances for Pt (111) and P25 (101). (B) XRD data.

5

6 The lattice distance of Pt-P25 composite catalyst was measured by high-resolution  
7 transmission electron microscopy (HRTEM). The Pt-P25 exhibits matching lattice distance  
8 for Pt (111)<sup>11</sup> and P25 (101)<sup>12</sup> by transmission electron microscope (TEM). The peak  
9 positions of Pt<sup>13</sup> and P25, composed with anatase and rutile TiO<sub>2</sub><sup>14</sup> was demonstrated by X-  
10 ray diffraction (XRD) analyses.

11

12

## 1 References and Notes

- 2 1 J. Taing, M. H. Cheng and J. C. Hemminger, *ACS Nano*, 2011, **5**, 6325–6333.  
3 2 Y. Li, Y. Cai, X. Chen, X. Pan, M. Yang and Z. Yi, *RSC Adv*, 2016, **6**, 2760–2767.  
4 3 S. Kumar, M. A. Isaacs, R. Trofimovaite, L. Durndell, C. M. A. Parlett, R. E.  
5 Douthwaite, B. Coulson, M. C. R. Cockett, K. Wilson and A. F. Lee, *Appl Catal B*,  
6 2017, **209**, 394–404.  
7 4 L. Wang, S. Duan, P. Jin, H. She, J. Huang, Z. Lei, T. Zhang and Q. Wang, *Appl Catal*  
8 *B*, 2018, **239**, 599–608.  
9 5 H. M. Hwang, S. Oh, J. H. Shim, Y. M. Kim, A. Kim, D. Kim, J. Kim, S. Bak, Y. Cho,  
10 V. Q. Bui, T. A. Le and H. Lee, *ACS Appl Mater Interfaces*, 2019, **11**, 35693–35701.  
11 6 M. Ye, X. Wang, E. Liu, J. Ye and D. Wang, *ChemSusChem*, 2018, **11**, 1606–1611.  
12 7 Q. Chen, Y. Ma, B. Qi, T. Zhang, L. Wang, J. Shi and X. Lan, *Appl Surf Sci*, 2021,  
13 **555**, 149648.  
14 8 Z. Wang, W. Zhou, X. Wang, X. Zhang, H. Chen, H. Hu, L. Liu, J. Ye and D. Wang,  
15 *Catalysts*, 2020, **10**, 1–11.  
16 9 W. Jia, T. Liu, Q. Li and J. Yang, *Catal Today*, 2019, **335**, 221–227.  
17 10 X. Zhu, A. Anzai, A. Yamamoto and H. Yoshida, *Appl Catal B*, 2019, **243**, 47–56.  
18 11 L. Wang, R. Tang, A. Kheradmand, Y. Jiang, H. Wang, W. Yang, Z. Chen, X. Zhong,  
19 S. P. Ringer, X. Liao, W. Liang and J. Huang, *Appl Catal B*, 2021, **284**, 119759.  
20 12 X. Zhao, J. Zhao, J. He, B. Li, Y. Zhang, J. Hu, H. Wang, D. Zhang and Q. Liu, *ACS*  
21 *Appl Energy Mater*, 2020, **3**, 6180–6187.  
22 13 B. Abida, L. Chirchi, S. Baranton, T. W. Napporn, H. Kochkar, J. M. Léger and A.  
23 Ghorbel, *Appl Catal B*, 2011, **106**, 609–615.  
24 14 Y. Jiao, H. Jiang and F. Chen, *ACS Catal*, 2014, **4**, 2249–2257.  
25
